# Supplementary material for: The characteristics of host lipid body biogenesis during coral-dinoflagellate endosymbiosis
Source: PeerJ. 2021 Jun 23;9:e11652. doi: 10.7717/peerj.11652 (PMC8234918; doi:10.7717/peerj.11652)
Supplement: Supplemental Information 3 [file peerj-09-11652-s003.xlsx]

## Sheet: Fig. 3B&C
	Raw numerical data - Fig. 3B & C										Total numbers of LB data - Fig. 3B					Percentage of LB number data - Fig. 3C									Percentage of LB number data - Fig. 3C									Percentage of LB number data - Table S1
	N1															N1									Average
		numbers	Near mesoglea (<1 µm)	Near coelenteron (<1 µm)	Near mesoglea (1-3 µm)	Near coelenteron (1-3 µm)	Near mesoglea (>3 µm)	Near coelenteron (>3 µm)	Sum			mean	Total LB numbers	SD			%	Near mesoglea (<1 µm)	Near coelenteron (<1 µm)	Near mesoglea (1-3 µm)	Near coelenteron (1-3 µm)	Near mesoglea (>3 µm)	Near coelenteron (>3 µm)			mean	Near mesoglea (<1 µm)	Near coelenteron (<1 µm)	Near mesoglea (1-3 µm)	Near coelenteron (1-3 µm)	Near mesoglea (>3 µm)	Near coelenteron (>3 µm)			%	Total LB number near mesoglea				Total LB number near coelenteron
	Time\										Time\					Time\									Time\									Time\		N1	N2	N3		N1	N2	N3
	06:00:00		65	37	24	25	2	5	158		06:00:00		153	21.9317		06:00:00		41.1392	23.4177	15.1899	15.8228	1.26582	3.16456		06:00:00		41.0387	22.3408	12.8152	15.8686	1.97233	5.96441		06:00:00		57.5949	53.4884	56.3953		42.4051	46.5116	43.6047
	09:00:00		60	40	28	27	2	6	163		09:00:00		176.667	17.2143		09:00:00		36.8098	24.5399	17.1779	16.5644	1.22699	3.68098		09:00:00		37.2063	27.0108	13.4904	16.5212	1.33393	4.4374		09:00:00		55.2147	50	50.8772		44.7853	50	49.1228
	12:00:00		81	42	25	30	5	12	195		12:00:00		182.333	12.0554		12:00:00		41.5385	21.5385	12.8205	15.3846	2.5641	6.15385		12:00:00		39.9605	20.2959	12.5705	18.0282	1.99198	7.15289		12:00:00		56.9231	56.3536	50.2924		43.0769	43.6464	49.7076
	15:00:00		170	76	26	57	3	23	355		15:00:00		309.667	79.3872		15:00:00		47.8873	21.4085	7.32394	16.0563	0.84507	6.47887		15:00:00		44.3057	19.4012	10.1776	17.5012	0.90276	7.71146		15:00:00		56.0563	55.0459	55.0562		43.9437	44.9541	44.9438
	18:30:00		153	31	47	78	2	42	353		18:30:00		319.667	29.7041		18:30:00		43.3428	8.78187	13.3144	22.0963	0.566572	11.898		18:30:00		40.0506	10.0124	13.2336	23.323	1.28447	12.0959		18:30:00		57.2238	55.8065	50.6757		42.7762	44.1935	49.3243
	21:00:00		121	38	19	37	1	58	274		21:00:00		242.333	30.1386		21:00:00		44.1606	13.8686	6.93431	13.5036	0.364964	21.1679		21:00:00		44.7271	13.8077	10.2013	11.2518	0.728414	19.2837		21:00:00		51.4599	55.2301	60.2804		48.5401	44.7699	39.7196
	00:00:00		88	26	19	15	0	4	152		00:00:00		212.333	52.3673		00:00:00		57.8947	17.1053	12.5	9.86842	0	2.63158		00:00:00		50.37	18.3425	11.1765	11.3991	1.10385	7.60804		00:00:00		70.3947	57.7236	59.8326		29.6053	42.2764	40.1674
	03:00:00		105	35	18	20	1	7	186		03:00:00		203.667	17.0392		03:00:00		56.4516	18.8172	9.67742	10.7527	0.537634	3.76344		03:00:00		53.3146	18.0795	9.47488	11.7291	0.65593	6.74598		03:00:00		66.6667	63.1818	60.4878		33.3333	36.8182	39.5122
	05:00:00		96	42	15	23	2	8	186		05:00:00		162.667	31.3741		05:00:00		51.6129	22.5806	8.06452	12.3656	1.07527	4.30108		05:00:00		50.6666	20.2813	10.5067	12.9648	1.07383	4.50681		05:00:00		60.7527	64.5714	61.4173		39.2473	35.4286	38.5827
	N2															N2									SD
		numbers	Near mesoglea (<1 µm)	Near coelenteron (<1 µm)	Near mesoglea (1-3 µm)	Near coelenteron (1-3 µm)	Near mesoglea (>3 µm)	Near coelenteron (>3 µm)	Sum								%	Near mesoglea (<1 µm)	Near coelenteron (<1 µm)	Near mesoglea (1-3 µm)	Near coelenteron (1-3 µm)	Near mesoglea (>3 µm)	Near coelenteron (>3 µm)			SD	Near mesoglea (<1 µm)	Near coelenteron (<1 µm)	Near mesoglea (1-3 µm)	Near coelenteron (1-3 µm)	Near mesoglea (>3 µm)	Near coelenteron (>3 µm)		Average
	Time\															Time\									Time\										mean	Near mesoglea	Near coelenteron
	06:00:00		51	30	15	20	3	10	129							06:00:00		39.5349	23.2558	11.6279	15.5039	2.32558	7.75194		06:00:00		1.4561	1.72698	2.0565	0.38962	0.611852	2.45553		Time\
	09:00:00		79	58	17	28	2	12	196							09:00:00		40.3061	29.5918	8.67347	14.2857	1.02041	6.12245		09:00:00		2.92184	2.52778	4.36327	2.21418	0.378493	1.46183		06:00:00		55.8262	44.1738
	12:00:00		73	31	26	33	3	15	181							12:00:00		40.3315	17.1271	14.3646	18.232	1.65746	8.28729		12:00:00		1.79241	2.76552	1.93134	2.54774	0.497835	1.07314		09:00:00		52.0306	47.9694
	15:00:00		88	30	31	47	1	21	218							15:00:00		40.367	13.7615	14.2202	21.5596	0.458716	9.63303		15:00:00		3.77288	4.9513	3.59855	3.56295	0.475521	1.68618		12:00:00		54.523	45.477
	18:30:00		125	24	42	73	6	40	310							18:30:00		40.3226	7.74194	13.5484	23.5484	1.93548	12.9032		18:30:00		3.43623	3.07628	0.362115	1.13097	0.686902	0.728806		15:00:00		55.3861	44.6139
	21:00:00		99	29	32	35	1	43	239							21:00:00		41.4226	12.1339	13.3891	14.6444	0.41841	17.9916		21:00:00		3.62116	1.64418	3.22813	4.92131	0.583841	1.66886		18:30:00		54.5686	45.4314
	00:00:00		113	48	26	30	3	26	246							00:00:00		45.935	19.5122	10.5691	12.1951	1.21951	10.5691		00:00:00		6.55123	1.20489	1.14752	1.326	1.05081	4.3356		21:00:00		55.6568	44.3432
	03:00:00		115	35	23	28	1	18	220							03:00:00		52.2727	15.9091	10.4545	12.7273	0.454545	8.18182		03:00:00		2.76729	1.91148	1.09507	0.987472	0.279951	2.58355		00:00:00		62.6503	37.3497
	05:00:00		93	27	19	23	1	12	175							05:00:00		53.1429	15.4286	10.8571	13.1429	0.571429	6.85714		05:00:00		3.06112	4.20449	2.28718	0.532925	0.501689	2.25452		03:00:00		63.4454	36.5546
	N3															N3																		05:00:00		62.2471	37.7529
		numbers	Near mesoglea (<1 µm)	Near coelenteron (<1 µm)	Near mesoglea (1-3 µm)	Near coelenteron (1-3 µm)	Near mesoglea (>3 µm)	Near coelenteron (>3 µm)	Sum								%	Near mesoglea (<1 µm)	Near coelenteron (<1 µm)	Near mesoglea (1-3 µm)	Near coelenteron (1-3 µm)	Near mesoglea (>3 µm)	Near coelenteron (>3 µm)
	Time\															Time\																		SD
	06:00:00		73	35	20	28	4	12	172							06:00:00		42.4419	20.3488	11.6279	16.2791	2.32558	6.97674												SD	Near mesoglea	Near coelenteron
	09:00:00		59	46	25	32	3	6	171							09:00:00		34.5029	26.9006	14.6199	18.7135	1.75439	3.50877											Time\
	12:00:00		65	38	18	35	3	12	171							12:00:00		38.0117	22.2222	10.5263	20.4678	1.75439	7.01754											06:00:00		2.11161	2.11161
	15:00:00		159	82	32	53	5	25	356							15:00:00		44.6629	23.0337	8.98876	14.8876	1.40449	7.02247											09:00:00		2.79216	2.79216
	18:30:00		108	40	38	72	4	34	296							18:30:00		36.4865	13.5135	12.8378	24.3243	1.35135	11.4865											12:00:00		3.67488	3.67488
	21:00:00		104	33	22	12	3	40	214							21:00:00		48.5981	15.4206	10.2804	5.60748	1.40187	18.6916											15:00:00		0.58044	0.58044
	00:00:00		113	44	25	29	5	23	239							00:00:00		47.2803	18.41	10.4603	12.1339	2.09205	9.62343											18:30:00		3.44508	3.44508
	03:00:00		105	40	17	24	2	17	205							03:00:00		51.2195	19.5122	8.29268	11.7073	0.97561	8.29268											21:00:00		4.42571	4.42571
	05:00:00		60	29	16	17	2	3	127							05:00:00		47.2441	22.8346	12.5984	13.3858	1.5748	2.3622											00:00:00		6.78926	6.78926
																																		03:00:00		3.09785	3.09785
																																		05:00:00		2.04013	2.04013

## Sheet: Light Intensity
Light Intensity - Fig. 3B
	/Light Intensity	N1	N2	N3	Mean					/Light Intensity	N1	N2	N3	Mean
Time									Time
00:00:00		0	0	0	0				continued
00:15:00		0	0	0	0				12:00:00		2515.2	1187.02	1531.45	1348.88
00:30:00		0	0	0	0				12:15:00		1347.03	1055.27	2250.49	1199.17
00:45:00		0	0	0	0				12:30:00		1206.83	945.435	2016.25	1074.36
01:00:00		0	0	0	0				12:45:00		1083.68	848.962	1810.51	964.73
01:15:00		0	0	0	0				13:00:00		1116.1	874.358	1864.67	993.588
01:30:00		0	0	0	0				13:15:00		1006.61	788.587	1681.75	896.121
01:45:00		0	0	0	0				13:30:00		975.803	764.45	1630.28	868.693
02:00:00		0	0	0	0				13:45:00		881.009	890.188	1471.9	784.304
02:15:00		0	0	0	0				14:00:00		856.411	670.917	1430.81	762.406
02:30:00		0	0	0	0				14:15:00		772.188	604.937	1290.1	687.428
02:45:00		0	0	0	0				14:30:00		966.872	522.432	814.145	593.672
03:00:00		0	0	0	0				14:45:00		503.685	394.59	841.509	448.398
03:15:00		0	0	0	0				15:00:00		368.556	288.729	615.748	328.101
03:30:00		0	0	0	0				15:15:00		386.472	302.765	645.68	344.051
03:45:00		0	0	0	0				15:30:00		252.719	197.982	422.219	224.98
04:00:00		0	0	0	0				15:45:00		220.774	172.956	368.848	196.541
04:15:00		0	0	0	0				16:00:00		140.389	109.982	234.549	124.98
04:30:00		0	0	0	0				16:15:00		147.403	115.477	246.267	131.224
04:45:00		0	0	0	0				16:30:00		91.2384	71.4767	152.432	81.2235
05:00:00		0	0	0	0				16:45:00		70.5258	55.2504	117.828	62.7845
05:15:00		0.5289	0	1.2279	0.5856				17:00:00		35.0734	27.4767	58.5971	31.2235
05:30:00		2.6665	0	5.5301	2.7322				17:15:00		31.5664	24.7293	52.7381	28.1015
05:45:00		7.45377	5.83933	12.453	6.6356				17:30:00		3.31989	26.103	85.6676	29.6625
06:00:00		0	8.92971	30.4422	10.1474				17:45:00		38.5823	30.2256	64.4596	34.3473
06:15:00		17.0988	13.3953	28.5669	15.2219				18:00:00		21.9213	17.1733	36.624	19.5151
06:30:00		15.5632	12.1923	26.0015	13.8549				18:15:00		4.38469	0	7.32551	3.9034
06:45:00		27.674	21.6799	46.2349	24.6363				18:30:00		5.48036	4.29334	9.15604	4.8788
07:00:00		37.8114	29.6217	63.1716	33.661				18:45:00		0	0	0	0
07:15:00		38.907	30.4799	65.0019	34.6363				19:00:00		0	0	0	0
07:30:00		62.0308	48.5953	103.635	55.2219				19:15:00		0	0	0	0
07:45:00		101.126	79.2224	168.951	90.0254				19:30:00		0	0	0	0
08:00:00		138.688	108.649	231.707	123.465				19:45:00		0	0	0	0
08:15:00		213.048	166.903	355.94	189.662				20:00:00		0	0	0	0
08:30:00		249.544	195.494	416.913	222.152				20:15:00		0	0	0	0
08:45:00		291.3	228.206	486.675	259.325				20:30:00		0	0	0	0
09:00:00		340.451	266.711	568.792	303.081				20:45:00		0	0	0	0
09:15:00		315.852	247.441	527.695	281.183				21:00:00		0	0	0	0
09:30:00		425.054	332.99	710.14	378.398				21:15:00		0	0	0	0
09:45:00		493.163	386.347	823.928	439.03				21:30:00		0	0	0	0
10:00:00		657.439	515.041	1098.38	585.274				21:45:00		0	0	0	0
10:15:00		737.825	578.017	1232.69	656.837				22:00:00		0	0	0	0
10:30:00		800.246	626.917	1336.97	712.406				22:15:00		0	0	0	0
10:45:00		965.666	756.508	1613.34	859.669				22:30:00		0	0	0	0
11:00:00		1066.9	835.818	1782.48	949.793				22:45:00		0	0	0	0
11:15:00		1399.76	861.561	1537.38	979.047				23:00:00		0	0	0	0
11:30:00		1137.24	890.917	1899.98	1012.41				23:15:00		0	0	0	0
11:45:00		1391.91	1090.43	2325.47	1239.13				23:30:00		0	0	0	0
continued									23:45:00		0	0	0	0
