# Supplementary material for: The characteristics of host lipid body biogenesis during coral-dinoflagellate endosymbiosis
Source: PeerJ. 2021 Jun 23;9:e11652. doi: 10.7717/peerj.11652 (PMC8234918; doi:10.7717/peerj.11652)
Supplement: Supplemental Information 4 [file peerj-09-11652-s004.xlsx]

## Sheet: Fig. 4B
	Raw numerical data - Fig. 4B
												Distributions
	Name/ Time	FPKM					Log2 (FPKM ratio)					Sunrise				Noon				Sunset				Midnight
		Sunrise	Noon	Sunset	Midnight		Sunrise	Noon	Sunset	Midnight		Time / Log2 FPKM				Time / Log2 FPKM				Time / Log2 FPKM				Time / Log2 FPKM
	BIP	82.54	232.21	115.16	71.85		0.2	1.49	-1.01	-0.68
	ATF6	56.05	53.95	39.82	46.78		0.26	-0.06	-0.44	0.23
	S1P	11.5	11.59	12.51	12.38		-0.11	0.01	0.11	-0.02
	IRE1	5.16	5.79	6.82	4.91		0.07	0.17	0.24	-0.47
	XBP1	89.65	114.58	97.75	85.1		0.08	0.35	-0.23	-0.2
	PERK	5.73	7.06	8.04	6.4		-0.16	0.3	0.19	-0.33
	eIF2α	43.07	42.12	40.95	44.79		-0.06	-0.03	-0.04	0.13
	SREBP1	22.67	25.6	24.42	23.69		-0.06	0.18	-0.07	-0.04
												Quantiles				Quantiles				Quantiles				Quantiles
												1	maximum	0.26		1	maximum	1.49		1	maximum	0.24		1	maximum	0.23
												0.995		0.26		0.995		1.49		0.995		0.24		0.995		0.23
												0.975		0.26		0.975		1.49		0.975		0.24		0.975		0.23
							Input to JMP ver.10.0.0					0.9		0.26		0.9		1.49		0.9		0.24		0.9		0.23
												0.75	quartile	0.17		0.75	quartile	0.3375		0.75	quartile	0.17		0.75	quartile	0.0925
												0.5	median	0.005		0.5	median	0.175		0.5	median	-0.055		0.5	median	-0.12
												0.25	quartile	-0.0975		0.25	quartile	-0.02		0.25	quartile	-0.3875		0.25	quartile	-0.435
												0.1		-0.16		0.1		-0.06		0.1		-1.01		0.1		-0.68
												0.025		-0.16		0.025		-0.06		0.025		-1.01		0.025		-0.68
							Analysis/ Distribution					0.005		-0.16		0.005		-0.06		0.005		-1.01		0.005		-0.68
												0	minimum	-0.16		0	minimum	-0.06		0	minimum	-1.01		0	minimum	-0.68
												Summary Statistics				Summary Statistics				Summary Statistics				Summary Statistics
												Mean		0.0275		Mean		0.30125		Mean		-0.15625		Mean		-0.1725
												Std Dev		0.150119		Std Dev		0.503202		Std Dev		0.411198		Std Dev		0.308441
												Std Err Mean		0.0530751		Std Err Mean		0.177909		Std Err Mean		0.145381		Std Err Mean		0.10905
												Upper 95% Mean		0.153003		Upper 95% Mean		0.721938		Upper 95% Mean		0.18752		Upper 95% Mean		0.0853629
												Lower 95% Mean		-0.0980026		Lower 95% Mean		-0.119438		Lower 95% Mean		-0.50002		Lower 95% Mean		-0.430363
												N		8		N		8		N		8		N		8
