# Supplementary material for: The characteristics of host lipid body biogenesis during coral-dinoflagellate endosymbiosis
Source: PeerJ. 2021 Jun 23;9:e11652. doi: 10.7717/peerj.11652 (PMC8234918; doi:10.7717/peerj.11652)
Supplement: Supplemental Information 5 [file peerj-09-11652-s005.xlsx]

## Sheet: Fig. 5D
	Raw numerical data - Fig. 5D
	Band intensity of western blot was quantified by ImageJ software (ver.1.50i).
	LB - BiP								Host - BiP
	Time\ Intensity	n1	n2	n3		Mean	SD		Time\ Intensity	n1	n2	n3		Mean	SD
	06:30	39448.1	42878.5	21251.7		34526.1	11623.2		06:30	48143.7	50893.6	31296.8		43444.7	10609.9
	12:00	43933.9	45544	21320.1		36932.7	13544.8		12:00	51173.8	51996.1	40378		47849.3	6483.38
	15:00	46594.5	67948.6	40996		51846.4	14223.1		15:00	40072.3	44890.5	58407.2		47790	9505.1
	18:00	17068.6	22483.6	16827.1		18793.1	3198.36		18:00	62675.4	55352.6	66306.9		61445	5579.85
	21:00	22474.8	21513.9	24715.8		22901.5	1643.06		21:00	87445.8	87927.8	70027.4		81800.3	10198.5
	00:00	18032.3	23660.4	17985.1		19892.6	3263.1		00:00	71525.5	82693.5	89551.2		81256.7	9098.35
	LB - BiP + Host - BiP
	Time\ Intensity	n1	n2	n3		Mean	SD
	06:30	87591.9	93772.1	52548.5		77970.9	22232.2
	12:00	95107.7	97540.1	61698.1		84782	20028.2
	15:00	86666.9	112839	99403.2		99636.4	13087.7
	18:00	79744	77836.2	83134		80238	2683.23
	21:00	109921	109442	94743.2		104702	8627.74
	00:00	89557.7	106354	107536		101149	10056
	LB - BiP/ (LB - BiP + Host - BiP)								Host - BiP/ (LB - BiP + Host - BiP)
	Time\ %	n1	n2	n3		Mean	SD		Time\ %	n1	n2	n3		Mean	SD
	06:30	0.450363	0.457263	0.404421		0.437349	0.0287243		06:30	0.549637	0.542737	0.595579		0.562651	0.0287243
	12:00	0.461939	0.466926	0.345555		0.424806	0.068679		12:00	0.538061	0.533074	0.654445		0.575194	0.068679
	15:00	0.537628	0.602172	0.412422		0.517407	0.0964779		15:00	0.462372	0.397828	0.587578		0.482593	0.0964779
	18:00	0.214042	0.288858	0.202409		0.235103	0.046915		18:00	0.785958	0.711142	0.797591		0.764897	0.046915
	21:00	0.204464	0.196579	0.260872		0.220638	0.0350657		21:00	0.795536	0.803421	0.739128		0.779362	0.0350657
	00:00	0.201348	0.222469	0.167247		0.197021	0.027864		00:00	0.798652	0.777531	0.832753		0.802979	0.027864
